# Supplementary material
Source: PubMed Central journal article supplement (PMC1464812)
Supplement: pcbi.0020051.sd001.pdf [file pcbi.0020051.sd001.pdf]

## Protocol S1. Fits Based on the Sanchez-Thieffry Network Structure

We fit models using the regulatory relationships in the model of Sanchez and Thieffry [1], with the addition of Tll activating *hb*. This link was necessary to activate the posterior *hb* domain, just as in all of our other models. We call this set of regulatory relationships the ST regulatory relationships. The best-fitting gene circuit model using these regulatory relationships, ST-GC, had an RMS error of 14.63, while our best-fitting ST-Logic model had an RMS error of 22.20. With the exception of Hb activation of *Kr*, the ST regulatory relationships are a subset of those in the Combined model, and with the exception of Hb repression of *gt*, they are a subset of the RPJ relationships. Like our RPJ-GC model, the ST-GC model fails to repress *Kr* in the anterior of the trunk at the early time points (Figure 2D11,24), though the ST-GC model does not display the same degree of ectopic *Kr* expression in the posterior as the RPJ-GC model does. Like the RPJ-Logic model, the ST-Logic model fails to sustain its posterior *gt* domain (Figure 2E). Thus, the ST models share the two major failings of the RPJ models. However, the ST-GC model does a better job of capturing the shifting of the posterior *gt* domain than any of our other models, including Unc-GC (Figure 2D). It does so by employing strong repression from Hb (Figure 1), a feature that was not found in any of our other models, but that was found by Jaeger et al. [2, 3].

### ST-GC

| Gene | Max prod. rate ( $R^a$ ) | regulatory weights ( $T^{ab}$ ) |        |         |                      |         |         |         |        | Bias ( $h^a$ ) | Decay ( $\lambda^a$ ) | Diff. ( $D^a$ ) |
|------|--------------------------|---------------------------------|--------|---------|----------------------|---------|---------|---------|--------|----------------|-----------------------|-----------------|
|      |                          | Bcd                             | Cad    | Hb      | Hb <sup>2</sup> /255 | Kr      | Gt      | Kni     | Tll    |                |                       |                 |
| Hb   | 36.5801                  | 0.1499                          | .      | 0.0314  | .                    | -0.0272 | .       | .       | 0.0172 | -3.5           | 0.1522                | 2.827           |
| Kr   | 13.8279                  | 0.9549                          | .      | 0.2054  | -0.6921              | .       | -0.3255 | -0.0629 | .      | -3.5           | 0.0637                | 0.463           |
| Gt   | 9.4553                   | 1.7412                          | 0.0001 | -0.1735 | .                    | -0.6990 | .       | .       | .      | -3.5           | 0.0615                | 0.116           |
| Kni  | 9.2782                   | 0.0195                          | 0.0790 | -0.1613 | .                    | .       | -0.5268 | .       | .      | -3.5           | 0.0285                | 0.118           |

### ST-Logic

| Gene | Max prod. rate ( $R^a$ ) | Production Rule                                                                     | Decay ( $\lambda^a$ ) | Diff. ( $D^a$ ) |
|------|--------------------------|-------------------------------------------------------------------------------------|-----------------------|-----------------|
| Hb   | 30.5                     | (Bcd $\geq$ 20 or Hb $\geq$ 59 or Tll $\geq$ 124) and Kr $\leq$ 148                 | 0.139                 | 1.54            |
| Kr   | 16.5                     | (Bcd $\geq$ 6 or Hb $\geq$ 146) and Hb $\leq$ 154 and Gt $\leq$ 4 and Kni $\leq$ 97 | 0.066                 | 0.7             |
| Gt   | 18                       | (Bcd $\geq$ 39 or Cad $\geq$ 130) and Hb $\leq$ 208 and Kr $\leq$ 15                | 0.062                 | 0.43            |
| Kni  | 17.4                     | (Bcd $\geq$ 6 or Cad $\geq$ 139) and Hb $\leq$ 4 and Gt $\leq$ 114                  | 0.073                 | 0.73            |

Figure 1: Parameters for best-scoring models using the ST regulatory relationships, with gene circuit and logical formalisms for production rate functions.

## References

- [1] Sanchez L, Thieffry D (2001) A logical analysis of the gap gene system. *Journal of Theoretical Biology* 211:115–141.
- [2] Jaeger J, Surkova S, Blagov M, Janssens H, Kosman D, et al. (2004) Dynamic control of positional information in the early *Drosophila* embryo. *Nature* 430:368–371.
- [3] Jaeger J, Blagov M, Kosman D, Kozlov KN, Manu, et al. (2004) Dynamical analysis of regulatory interactions in the gap gene system of *Drosophila melanogaster*. *Genetics* 167:1721–1737.

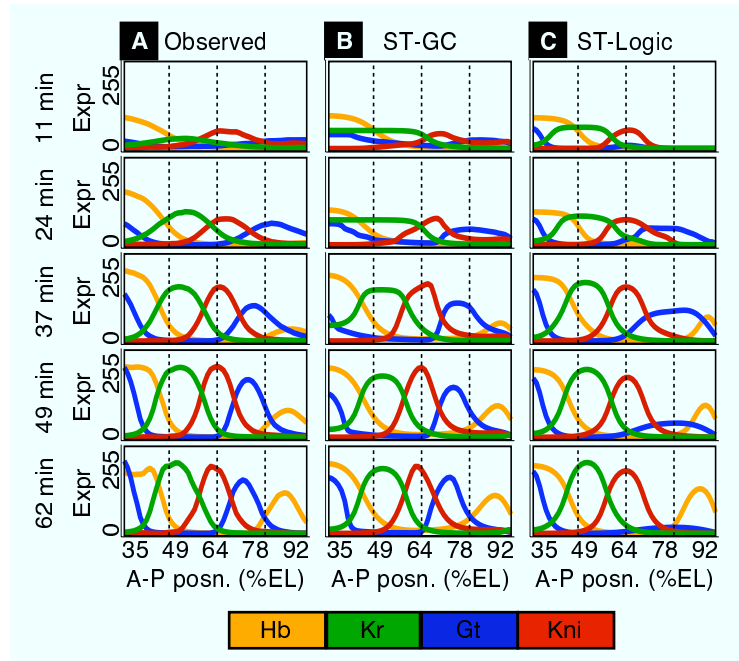

Figure 2: Observed gap expression and simulated expression from the ST models.
